# Supplementary material
Source: Research Square preprint supplement (doi:10.21203/rs.3.rs-9265904/v1)
Supplement: Supplementary file 1 [file e311aa783c0fc8879112543e.docx]

**Table S1.**  **Overall response rate and clinical benefit rate**

|  | **n = 46** | |
| --- | --- | --- |
| **n (%)** | **95% CI** |
| **ORR** | 4 (8.7) | 2.4–20.8 |
| **CBR** | 11 (23.9) | 12.6–38.8 |
| **PR** | 4 (8.7) |  |
| **SD** | 20 (43.5) |  |
| **SD ≥ 24 weeks** | 7 (15.2) |  |
| **SD < 24 weeks** | 13 (28.3) |  |
| **PD** | 22 (47.8) |  |

Abbreviations: ORR, overall response rate; CBR, clinical benefit rate; PR, partial response; SD, stable disease; PD, progressive disease

**Table S3.** **Biomarker analysis**

1. **Before and two months after abemaciclib rechallenge**

|  | Gene |  | n | mPFS (m)  (95%CI) | HR  (95%CI) | P value | mOS (m)  (95%CI) | HR  (95%CI) | P value |
| --- | --- | --- | --- | --- | --- | --- | --- | --- | --- |
| Before abemaciclib rechallenge | *FGFR1* | Amplification  + | 4 | 1.5  (1–NA) | 5.05  (1.73–14.76) | 0.003 | 19.8  (3.7–NA) | 4.44  (1.41–13.98) | 0.01 |
| - | 60 | 4.2  (2.8–5.7) | reference |  | NA  (24.8–NA) | reference |  |
| *TP53* | Mutant | 17 | 3.8  (1.4–4.4) | 1.54  (0.85–2.77) | 0.15 | 24.8  (18.8–NA) | 2.78  (1.07–7.25) | 0.04 |
| Wild-type | 47 | 4.2  (2.7–7.1) | reference |  | NA  (25.3–NA) | reference |  |
| Two months post-abemaciclib rechallenge | *FGFR1* | *A*mplification  + | 6 | 2.2  (1–NA) | 2.71  (1.13–6.50) | 0.03 | 25.1  (3.7–NA) | 3.39  (1.15–9.93) | 0.03 |
| - | 58 | 4.2  (2.8–6.5) | reference |  | NA  (28.6–NA) | reference |  |
| *TP53* | Mutant | 21 | 3.8  (1.7–4.4) | 1.40  (0.80–2.42) | 0.24 | 24.8  (16.4–28.2) | 2.91  (1.14–7.43) | 0.03 |
| Wild-type | 43 | 4.2  (2.7–7.1) | reference |  | NA  (25.3–NA) | reference |  |
| *CCND1* | Amplification  + | 8 | 2.1  (1–4.6) | 2.40  (1.11–5.19) | 0.03 | 28.2  (3.4–NA) | 1.91 (0.62–5.82) | 0.26 |
| - | 56 | 4.2  (2.8–6.5) | reference |  | NA  (24.8–NA) | reference |  |

Note: HR, 95% CI, and p value for PFS, OS are calculated using the Cox proportional hazards model.

**Figure S1. CONSORT diagram**

Enrolled (N = 65)

Withdraw by patient (n = 1)

Received intervention (n = 64)

Discontinued (n = 58, 90.6%)

Progressive disease (n = 54, 84.4%)

AEs (n = 2, 3.1%)

Other (n = 2, 3.1%)

On study treatment (n = 6, 9.4%)

**Figure S2.** **Chemotherapy-free interval**

**Chemotherapy-free survival (%)**

**No. at risk** 64 33 29 60 46 26 24 16 7 7 7 6 5 3 2 1 0

| Median, months | 6.7 |
| --- | --- |
| 95%CI | 4.9–11.0 |

**Figure S3. Overall survival**

**No.at risk** 64 64 62 62 60 60 58 46 37 34 27 21 18 11 9 2 2 2 0

**Overall survival (%)**

**Time (months)**

**No.at risk 64 64 62 62 60 60 58 46 37 34 27 21 18 11 9 2 2 2 0**

| Median, months | 28.7 |
| --- | --- |
| 95%CI | 25.4–NE |
